# Supplementary material
Source: publisher figshare collection journal article supplement (https://wiley.figshare.com/articles/dataset/_/5841510)

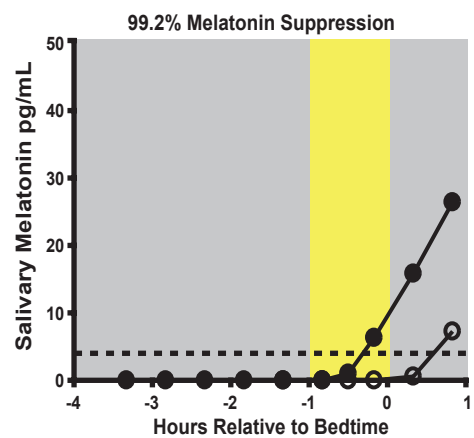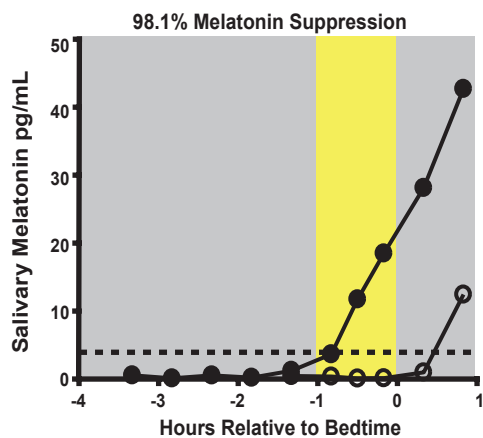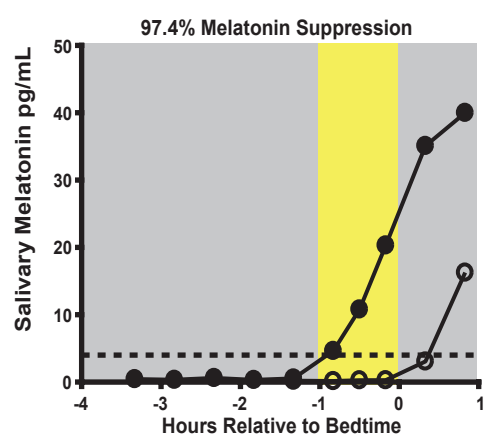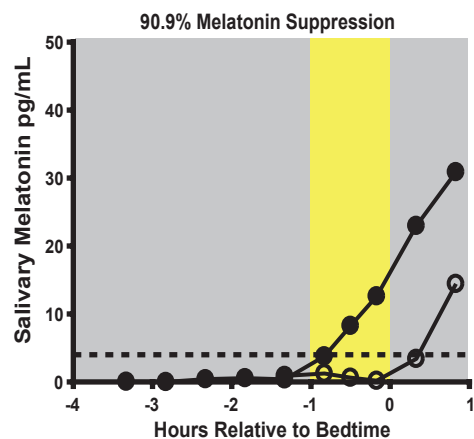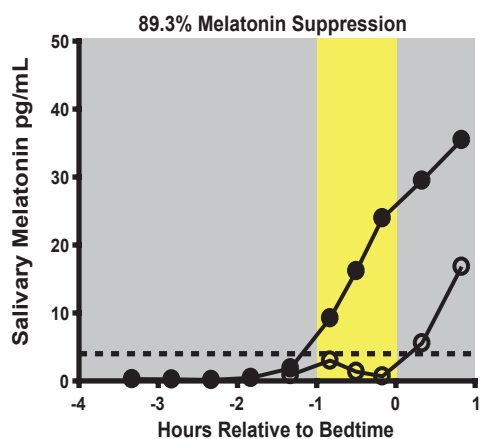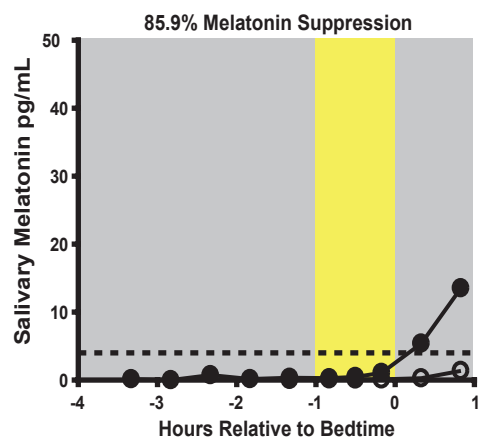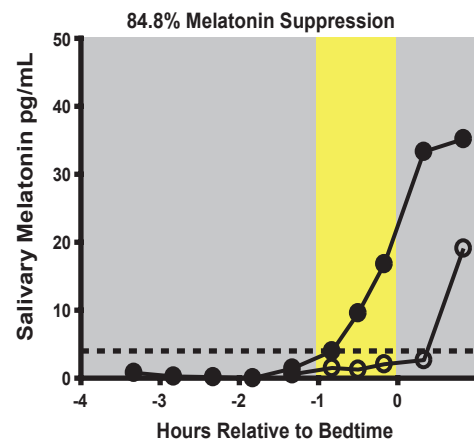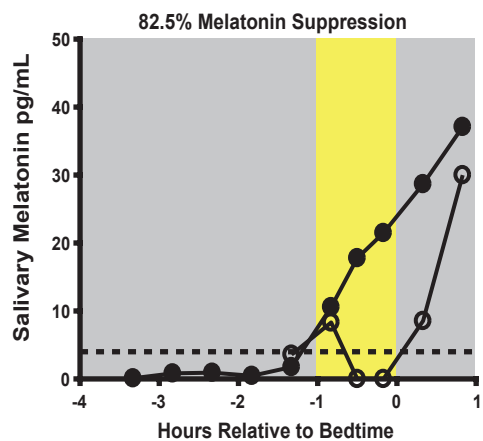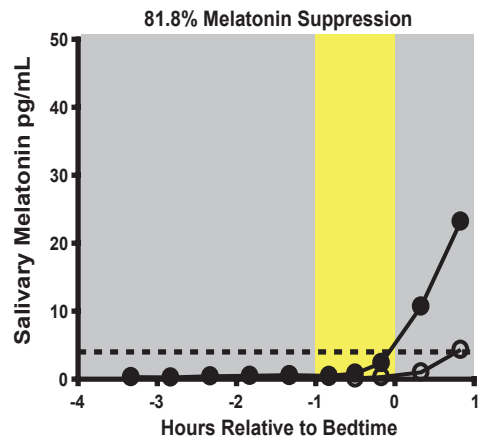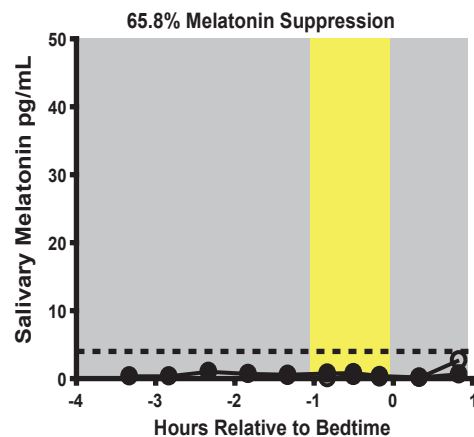

Supplement: Supplementary file 1 [file 1]
